# Supplementary material
Source: ML conference proceedings conference paper supplement (https://openaccess.thecvf.com/content/CVPR_2020/html/Ko_Embedding_Expansion_Augmentation_CVPR_2020_paper.html)
Supplement: Supplementary file 2 [file Ko_Embedding_Expansion_Augmentation_CVPR_2020_supplemental.zip]

Archive with 2 entries (2 files):
- supplementary material.pdf
- supplementary video.mp4
